# Supplementary material for: Synthesis and characterisation of cerium(iv)-incorporated hydrous iron(iii) oxide as an adsorbent for fluoride removal from water
Source: Royal Society of Chemistry journal article supplement (doi:10.1039/c7ra00265c), 2017-01-01
Supplement: c7ra00265c1.pdf [file c7ra00265c1.pdf]

### Supporting Information

## Synthesis and characterisation of cerium(IV)-incorporated hydrous iron(III) oxide as an adsorbent for fluoride removal from water

Kankan Mukhopadhyay<sup>b</sup>, Abir Ghosh<sup>a</sup>, Supriyo Kumar Das<sup>b</sup>, Bibhutibhushan Show<sup>c</sup>, Palani Sasikumar<sup>a\*</sup>, Uday Chand Ghosh<sup>a\*</sup>

<sup>a</sup>Department of Chemistry, Presidency University, 86/1 College Street, Kolkata-700073, India.

<sup>b</sup>Department of Geology, Presidency University, 86/1 College Street, Kolkata-700073, India.

<sup>c</sup>Department of Chemistry, Jadavpur University, Kolkata-700032, India

\*Corresponding authors E-mail: ucghosh@yahoo.co.in; sasikumar.chem@presiuniv.ac.in

Fax: +91-33-2241 3893; Tel: +91-33-2241 3893

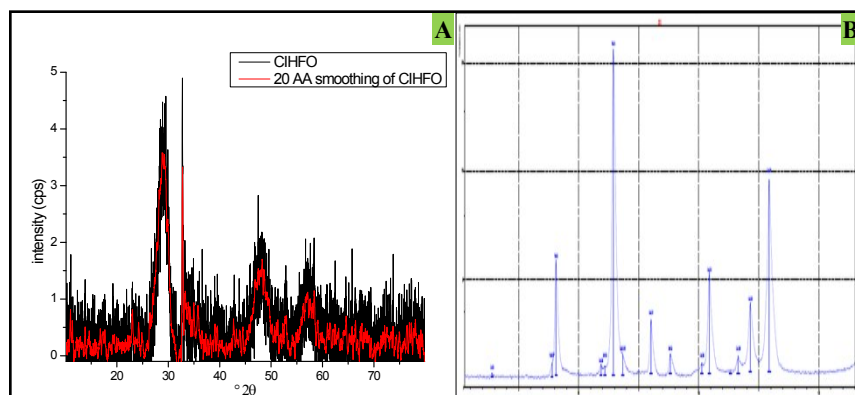

Figure S<sub>1</sub>: The plots of (A) powder X-ray diffraction patterns of CIHFO and (B) X-ray fluorescence pattern of CIHFO for the composition.

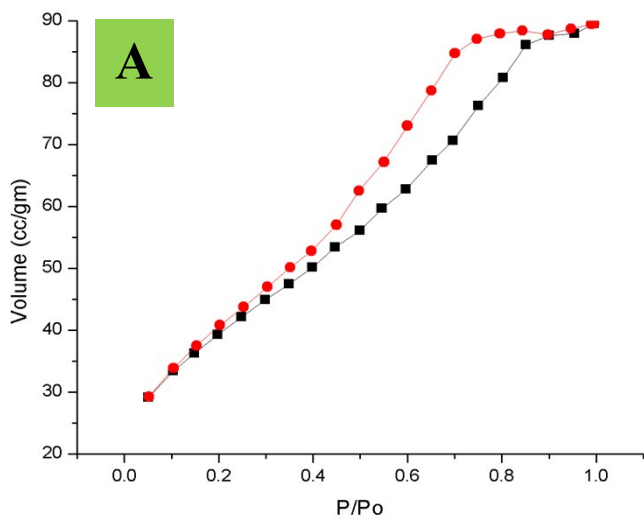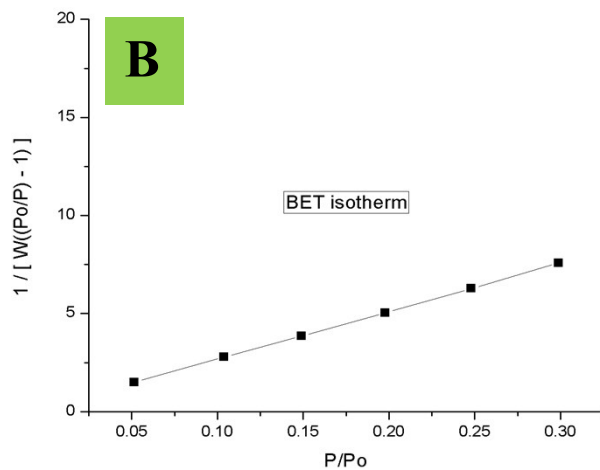

Figure S2: The plots of (A) N<sub>2</sub>(vapor) adsorption (black) – desorption (red), Major distributions of pores are of 21.4 Å radius and (B) pore size distribution of CIHFO with Surface Area = 140.711 m<sup>2</sup>/g.

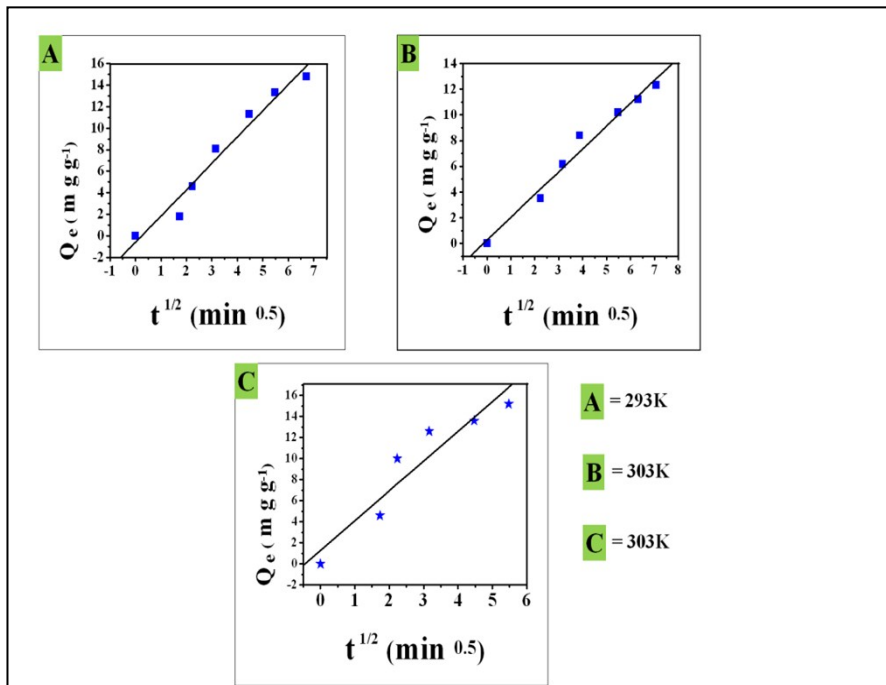

Fig S<sub>3</sub>: The plot of  $Q_e$  versus  $t^{1/2}$  (Weber-Morris plot) of the equilibriums of fluoride adsorption by CIHFO at temperature (A) 293, (B) 303 and (C) 313 K.  $C_i$  of fluoride = 10.0 mg L<sup>-1</sup>,  $C_i = 10 - 60$  mg L<sup>-1</sup>, Ionic strength = 1M and pH 7.0 ( $\pm$  0.2).

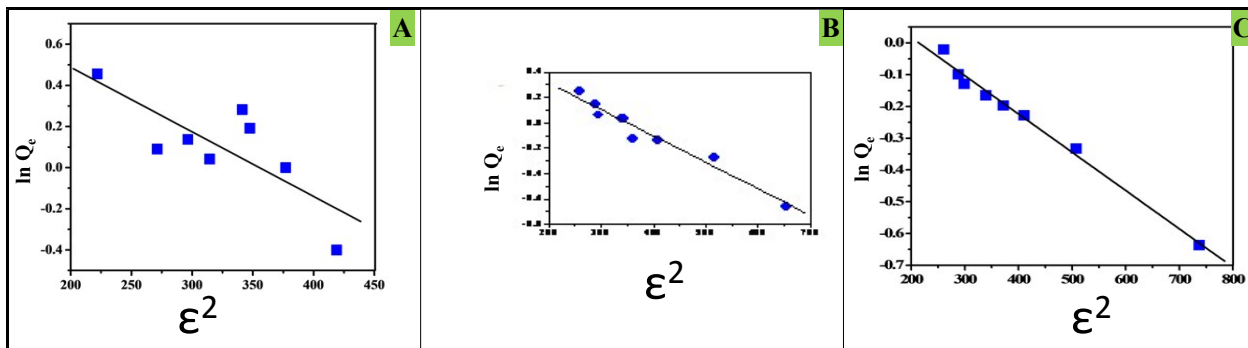

Fig S<sub>4</sub>: Dubinin-Redushkevich (D-R) isotherm plots of fluoride adsorption on CIHFO at temperatures: (A) 293K, (B) 303K and (C) 313K. Ionic strength = 1.0 M and pH = 7.0 (± 0.2)

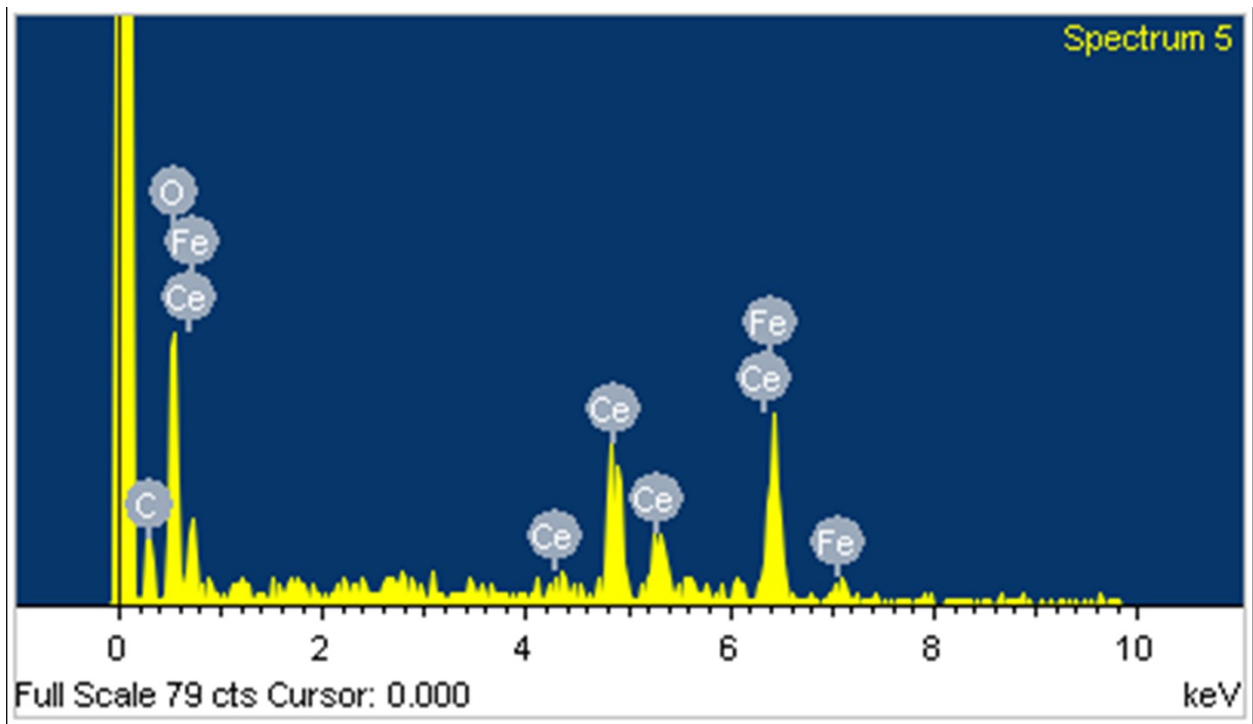

Fig. S<sub>5</sub>: EDX spectra of CIHFO
